# Supplementary material for: Toxicity Effects of Polystyrene Nanoplastics with Different Sizes on Freshwater Microalgae Chlorella vulgaris
Source: MDPI journal article supplement (doi:10.3390/molecules28093958), 2023-05-08
Supplement: s1 [file s1]

## Supplementary information

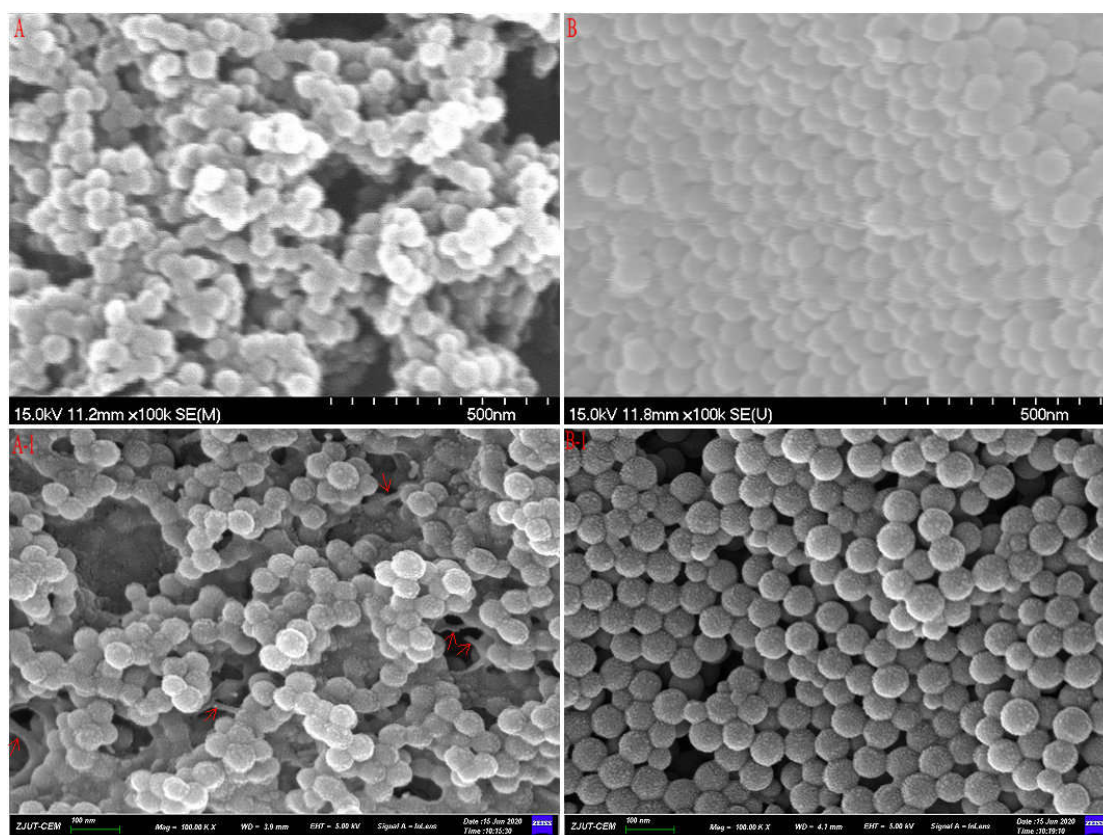

Figure S1. The SEM images of 50 nm PS-NPs (left) and 70 nm PS-NPs (right) (above: raw materials; below: PS-NPs after 72 h exposure in BG-11, red arrows represent the deformation of PS-NPs).

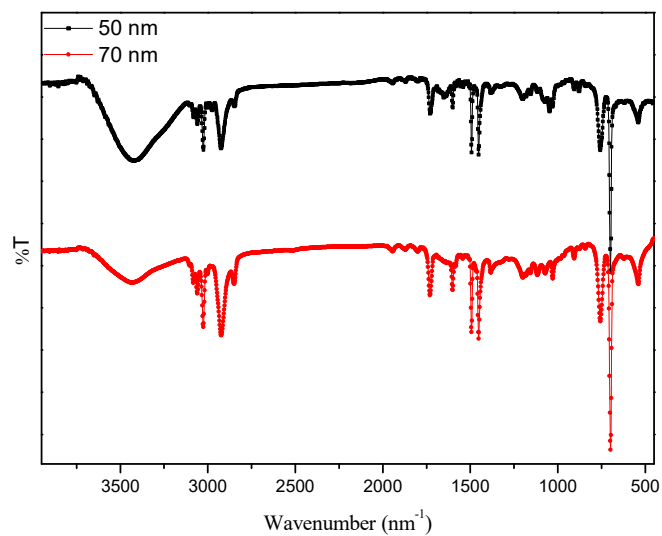

Figure S2. FTIR characterization of primary 50 nm and 70 nm PS-NPs

Table S1. The  $EC_{50}$  values for algae growth and chlorophyll a after exposing to 50 and 70 nm PS-NPs (0-50 mg/L) for 72 h.

| PS-NPs<br>size | EC <sub>50</sub> (72h) | Growth                  |             | EC <sub>50</sub> (72h) | Chl-a                   |             |
|----------------|------------------------|-------------------------|-------------|------------------------|-------------------------|-------------|
|                |                        | 95% confidence interval |             |                        | 95% confidence interval |             |
|                |                        | Lower limit             | Upper limit |                        | Lower limit             | Upper limit |
| 50 nm          | 19.89                  | 15.58                   | 27.44       | 17.52                  | 13.31                   | 24.72       |
| 70 nm          | >50                    | -                       | -           | >50                    | -                       | -           |

$EC_{50}$  was calculated according to their inhibition rates in respect to the control.

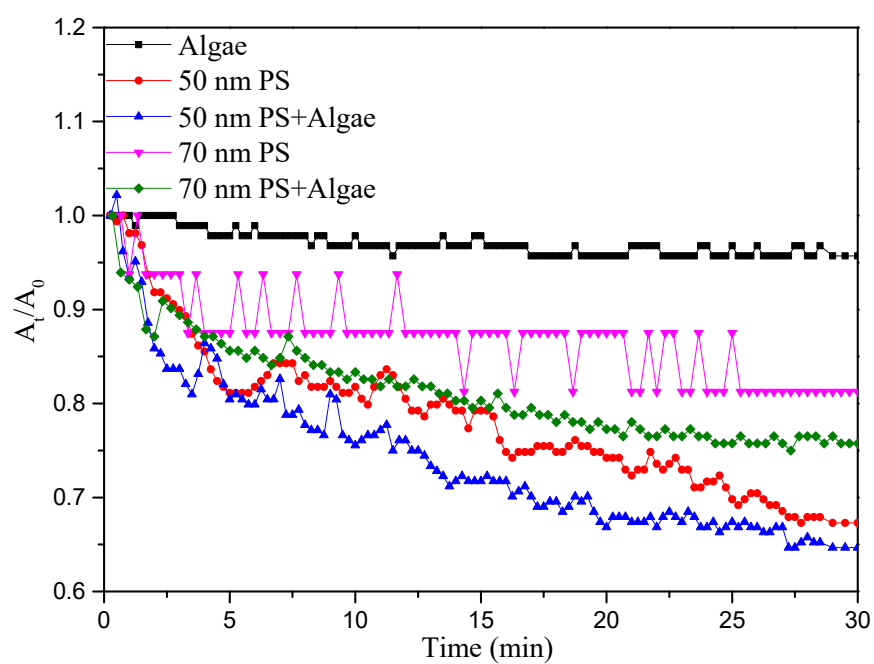

Figure S3. Effect of PS-NPs on sedimentation for algal cell (20 mg/L PS-NPs)
